# Supplementary material for: Expression level of a flavonoid 3′-hydroxylase gene determines pathogen-induced color variation in sorghum
Source: PubMed Central journal article supplement (PMC4219097; doi:10.1186/1756-0500-7-761), 2014-10-27
Supplement: 13104_2014_3281_MOESM2_ESM.pdf [file 13104_2014_3281_MOESM2_ESM.pdf]

Flavonoid 3'-hydroxylase (F3'H)

```

BTx623      1  MDVPLPLLLGSLAVSVVWVWCLLLRRGGDGKGGKGRPMPPGPRGWPVLGNLPQLGSHPHHT
(Sb04g024710) *****
Nakei-MS3B  1  MDVPLPLLLGSLAVSVVWVWCLLLRRGGDGKGGKGRPMPPGPRGWPVLGNLPQLGSHPHHT
(Sb04g024710N) *****

61  MCALAKKYGPLFRLRFGSAEVVVAASARVAAQFLRTHDANFSNRPPNSGAEHVAYNYQDM
*****

61  MCALAKKYGPLFRLRFGSAEVVVAASARVAAQFLRTHDANFSNRPPNSGAEHVAYNYQDM

121 AFAPYGSRWRALRKLALHLFSAKALDDLRSIREGEVALLVRELSRHQHAGVPLGQVA
*****

121 AFAPYGSRWRALRKLALHLFSAKALDDLRSIREGEVALLVRELSRHQHAGVPLGQVA

181 NVCATNTLARATVGRRVFAVDGGEEAREFKDMVVELMQLAGVFNVDGDFVPALARLDLQGV
*****

181 NVCATNTLARATVGRRVFAVDGGEEAREFKDMVVELMQLAGVFNVDGDFVPALARLDLQGV

241 VGKMKRLHRRYDDMMNGI IREKAAEEGKDLLSVLLARTREQQSIADGEDSRITETEIKA
*****

241 VGKMKRLHRRYDDMMNGI IREKAAEEGKDLLSVLLARTREQQSIADGEDSRITETEIKA

301 LLLNLFTAGTDTTSSTVEWALAE LIRHPDVLKKAQEELDAVVGRNRLVSELDLPRLT YLT
*****

301 LLLNLFTAGTDTTSSTVEWALAE LIRHPDVLKKAQEELDAVVGRNRLVSELDLPRLT YLT

361 AVIKETFRMHPSTPLSLPRIAAEECEVDGFRIPAGTTLLVNVWAIARDPEAWPEPLQFRP
*****

361 AVIKETFRMHPSTPLSLPRIAAEECEVDGFRIPAGTTLLVNVWAIARDPEAWPEPLQFRP

421 DRFLPGGSHAGVDVKGSDFELIPFGAGRRICAGLSWGLRMVTLMTATLVHALDWDLDADM
*****

421 DRFLPGGSHAGVDVKGSDFELIPFGAGRRICAGLSWGLRMVTLMTATLVHALDWDLDADM

481 TADKLDMEAYGLTLQRAVPLKVRPA PRLLPSAYAAE (518aa)
*****

481 TADKLDMEAYGLTLQRAVPLMVRPT PRLLPSAYAAE (518aa)

```

Figure S1
