# Supplementary material for: Expression level of a flavonoid 3′-hydroxylase gene determines pathogen-induced color variation in sorghum
Source: PubMed Central journal article supplement (PMC4219097; doi:10.1186/1756-0500-7-761), 2014-10-27
Supplement: 13104_2014_3281_MOESM3_ESM.pdf [file 13104_2014_3281_MOESM3_ESM.pdf]

|        |       |                                                                            |      |                                                                        |
|--------|-------|----------------------------------------------------------------------------|------|------------------------------------------------------------------------|
| BTx623 | -1002 | TGAGAACTAAAAC TAATAGCACAA TTTGTCTGTAAATTACGAGACGAATCTTTTAAACCT<br>*****    | -402 | CTACTCCCTCCGTC CCTGAAAGCTGCAATTTCTAGAGTTTTTCTAAGTCAATTTTTTACA<br>***** |
| Nakei  | -1002 | TGAGAACTAAAAC TAATAGCACAA TTTGTCTGTAAATTACGAGACGAATCTTTTAAACCT<br>*****    | -402 | CTACTCCCTCCGTC CCTGAAAGCTGCAATTTCTAGAGTTTTTCTAAGTCAATTTTTTACA<br>***** |
|        | -942  | AGTTACTTTTATGATTAGATAATGTTTGTCAAGTAAAAACGAAAATATTATAGTGTCAAAA<br>*****     | -342 | ACTTTGACCAAATTTATAGAAAAAATGCTAAGATTATAGTACCAAATTAATACCATTA<br>*****    |
|        | -942  | AGTTACTTTTATGATTAGATAATGTTTGTCAAGTAAAAACGAAAATATTATAGTGTCAAAA<br>*****     | -342 | ACTTTGACCAAATTTATAGAAAAAATGCTAAGATTATAGTACCAAATTAATACCATTA<br>*****    |
|        | -882  | TCCAAAAC TTTTGAATCTAAATAAGGCCCGGTGAAAATGACATAGAA TTGATTGTA<br>*****        | -282 | AATTTATTTATAGAATATATTTTTGAAAGATACTTATTTTATGTTATAGATATTGATACTC<br>***** |
|        | -882  | TCCAAAAC TTTTGAATCTAAATAAGGCCCGGTGAAAATGACATAGAA TTGATTGTA<br>*****        | -282 | AATTTATTTATAGAATATATTTTTGAAAGATACTTATTTTATGTTATAGATATTGATACTC<br>***** |
|        | -822  | CTGTTGCTGGGCAC TGTGCTCACTGCACGACTCCTCGTCTGTTAATGATTTTGTGAAA<br>*****       | -222 | TTTTCTATAAAGTTGGTCAAAGTTAGAAAAGTTGACTCACATGGATTCTAGGAGTTGAA<br>*****   |
|        | -822  | CTGTTGCTGGGCAC TGTGCTCACTGCACGACTCCTCGTCTGTTAATGATTTTGTGAAA<br>*****       | -222 | TTTTCTATAAAGTTGGTCAAAGTTAGAAAAGTTGACTCACATGGATTCTAGGAGTTGAA<br>*****   |
|        | -762  | ATTGATTACACCGCTATTGAGCACTGCTGATTGCTGAGCACTGCCGCTCTCAAATGATTT<br>*****      | -162 | GCTTTTGGGACGGACCACTAAAGTCTCCGAGCTCCCAATTGCGGCGTGGGTAGGTAG<br>*****     |
|        | -762  | ATTGATTACACCGCTATTGAGCACTGCTGATTGCTGAGCACTGCCGCTCTCAAATGATTT<br>*****      | -162 | GCTTTTGGGACGGACCACTAAAGTCTCCGAGCTCCCAATTGCGGCGTGGGTAGGTAG<br>*****     |
|        | -702  | TGTGGAAACAGTACATTTGAAATAAAAT TATTTTGTGGGTC TTTT TTTTAAATTTGCC<br>***** * * | -102 | GGACGGCGCCTCAGGGAGATTGTTTGTGAAGCCTGAAGCACGCCAAGTGAAGTGGCATG<br>*****   |
|        | -702  | TGTGGAAACAGTACATTTGAAATAAAAT TATTTTGTGGGTC TTTT TTTTAAATTTGCC<br>*****     | -102 | GGACGGCGCCTCAGGGAGATTGTTTGTGAAGCCTGAAGCACGCCAAGTGAAGTGGCATG<br>*****   |
|        | -642  | AATTCAAAATGCCAAATCTTAGAAATAAGATGATCTTTTACTTGCCATATATTTTAG<br>*****         | -42  | TGTATATATAGATGAACCACTCCACGCTTACCGCACGCTCAACGCTCAGTCCACGCCA<br>*****    |
|        | -642  | AATTCAAAATGCCAAATCTTAGAAATAAGATGATCTTTTACTTGCCATATATTTTAG<br>*****         | -42  | TGTATATATAGATGAACCACTCCACGCTTACCGCACGCTCAACGCTCAGTCCACGCCA<br>*****    |
|        | -582  | GAGTTGGCAAATCATATCACAGAGTTTCTTCGATCTTGTGTCGAAGCCGGCTATAAGCTT<br>*****      |      |                                                                        |
|        | -582  | GAGTTGGCAAATCATATCACAGAGTTTCTTCGATCTTGTGTCGAAGCCGGCTATAAGCTT<br>*****      |      |                                                                        |
|        | -522  | GCAGCTTCTTCTTATTTTCTCTTTTTTTTCTTTTTTGTCTCTTTTTTCCTCGTTTTT<br>*****         |      |                                                                        |
|        | -522  | GCAGCTTCTTCTTATTTTCTCTTTTTTTTCTTTTTTGTCTCTTTTTTCCTCGTTTTT<br>*****         |      |                                                                        |
|        | -462  | GTCCATTCAGTATTTAGCAAATTTACAACTGTTATTATACTTGCTCTTTTATCTC<br>*****           |      |                                                                        |
|        | -462  | GTCCATTCAGTATTTAGCAAATTTACAACTGTTATTATACTTGCTCTTTTATCTC<br>*****           |      |                                                                        |

(-664) (-661)

(-144)

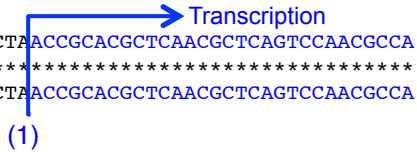

Figure S2
