# Supplementary material for: Expression level of a flavonoid 3′-hydroxylase gene determines pathogen-induced color variation in sorghum
Source: PubMed Central journal article supplement (PMC4219097; doi:10.1186/1756-0500-7-761), 2014-10-27
Supplement: 13104_2014_3281_MOESM4_ESM.pdf [file 13104_2014_3281_MOESM4_ESM.pdf]

Tan1 Sb04g031730

|              |              |                                                   |     |     |     |   |   |   |                |          |          |          |          |          |
|--------------|--------------|---------------------------------------------------|-----|-----|-----|---|---|---|----------------|----------|----------|----------|----------|----------|
|              |              | 901                                               | 911 | 921 | 931 |   |   |   |                |          |          |          |          |          |
| <i>Tan1</i>  | Nakei-MS3B   | TGGGAACTGCCCCGAGACGGCGGCGGCTGTGCCCCGCGAG          |     |     |     |   |   |   |                |          |          |          |          |          |
|              | ShanQuiRed   | TGGGAACTGCCCCGAGACGGCGGCGGCTGTGCCCCGCGAG          |     |     |     |   |   |   |                |          |          |          |          |          |
|              | (amino acid) | W                                                 | E   | L   | P   | E | T | A | A              | V        | P        | A        | E        |          |
|              |              |                                                   |     |     |     |   |   |   |                |          |          |          |          |          |
| <i>tan1b</i> | M36001       | TGGGAACTGCCCCGAGACGGCGG <u>CGGGCAGCGG</u> CGGCTGT |     |     |     |   |   |   |                |          |          |          |          |          |
|              | BTx623       | TGGGAACTGCCCCGAGACGGCGG <u>CGGGCAGCGG</u> CGGCTGT |     |     |     |   |   |   |                |          |          |          |          |          |
|              | (amino acid) | W                                                 | E   | L   | P   | E | T | A | <u>A</u>       | <u>G</u> | <u>S</u> | <u>G</u> | <u>G</u> | <u>C</u> |
|              |              |                                                   |     |     |     |   |   |   | 10bp-insertion |          |          |          |          |          |
|              |              |                                                   |     |     |     |   |   |   | frame shift    |          |          |          |          |          |

Figure S3
